# Supplementary material
Source: Springer Nature journal article supplement (https://www.springermedizin.de/resource/supplementary/12913_2012_2621_MOESM2_ESM.pdf/9531028)
Supplement: MOESM2 [file 9531028]

## Diagnosis

Delays and difficulties in receiving a diagnosis

Lack of support from GP

Lack of information during consultations

Poor doctor-patient relationship

Difficulties in transition between child and adult services

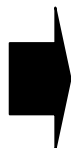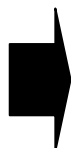

## Treatment and Support

Lack of individualised treatment programs

Lack of additional psychological and educational support alongside medication

Inadequate specialist support with adjusting medication

Little or no monitoring or advice on and off medication

Poor access to a wide range of medications

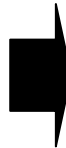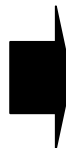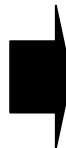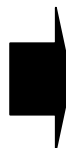

## Patients' desired outcomes from Care

Address psychosocial needs

Reduce disempowerment

Learn practical coping strategies

Deal with emotional burden

Reduce negative self-perception

Gain optimum benefits of treatment

Increase self-understanding

Reduce levels of stress

Alleviate social and emotional impairment

Improve organisational skills

Reduce side effects of medication
